# Supplementary material
Source: HighWire-hosted journal article supplement (http://www.jrheum.org/highwire/filestream/29679/field_highwire_adjunct_files/0/140949_DataSuppl.pdf)
Supplement: 140949_DataSuppl.pdf [file 140949_DataSuppl.pdf]

**Table S1.** Tag single-nucleotide polymorphisms (SNP) included in this study.

| Gen   | CHR    | Tag SNP                                                                                                                                     | SNP Identified                                                                                                                                                                       | Genotyping |
|-------|--------|---------------------------------------------------------------------------------------------------------------------------------------------|--------------------------------------------------------------------------------------------------------------------------------------------------------------------------------------|------------|
| IFI16 | 1      | rs9887904                                                                                                                                   | rs9887904                                                                                                                                                                            | SEQUENOM   |
|       |        | rs1417806                                                                                                                                   | rs1417806                                                                                                                                                                            | SEQUENOM   |
|       |        | rs2276404                                                                                                                                   | rs2276404                                                                                                                                                                            | SEQUENOM   |
|       |        | rs12727764                                                                                                                                  | rs12727764                                                                                                                                                                           | SEQUENOM   |
|       |        | rs1361564                                                                                                                                   | rs12738378, rs1361565, rs1361564                                                                                                                                                     | SEQUENOM   |
|       |        | rs866484                                                                                                                                    | rs866484, rs856064                                                                                                                                                                   | SEQUENOM   |
|       |        | rs856046                                                                                                                                    | rs856049, rs856046, rs11265131, rs7535856                                                                                                                                            | SEQUENOM   |
|       |        | rs1057024                                                                                                                                   | rs1057024                                                                                                                                                                            | SEQUENOM   |
|       |        | rs12093523                                                                                                                                  | rs12094741, rs1101991, rs12093523, rs11265133, rs856054, rs2106095, rs1101995, rs1101996, rs1101998, rs1101993                                                                       | SEQUENOM   |
|       |        | rs1772408                                                                                                                                   | rs855865, rs12124059, rs2570916, rs1772408, rs1772405, rs1057028, rs861318, rs856055, rs856052, rs856053, rs1633265, rs1772414, rs856058, rs1057027, rs1772415, rs1614182, rs1633256 | SEQUENOM   |
|       |        | rs3754459                                                                                                                                   | rs3754459                                                                                                                                                                            | TaqMan     |
|       |        | rs7532207                                                                                                                                   | rs7532207                                                                                                                                                                            | SEQUENOM   |
|       | rs6940 | rs6940, rs1772407, rs3018316, rs3737522, rs2814770, rs3768513, rs2814771, rs1616024, rs1633266, rs12098223, rs1633267, rs3754460, rs3768515 | SEQUENOM                                                                                                                                                                             |            |
| AIM2  | 1      | rs855871                                                                                                                                    | rs855871                                                                                                                                                                             | SEQUENOM   |
|       |        | rs855873                                                                                                                                    | rs855873                                                                                                                                                                             | SEQUENOM   |
| IFIH1 | 2      | rs1990760                                                                                                                                   | rs1990760                                                                                                                                                                            | TaqMan     |
|       |        | rs3747517*                                                                                                                                  | rs3747517                                                                                                                                                                            | SEQUENOM   |
|       |        | rs13023380                                                                                                                                  | rs13023380                                                                                                                                                                           | SEQUENOM   |
|       |        | rs17715343                                                                                                                                  | rs17715343                                                                                                                                                                           | SEQUENOM   |
| TLR9  |        | rs352140                                                                                                                                    | rs352140, rs352139                                                                                                                                                                   | SEQUENOM   |
|       |        | rs187084                                                                                                                                    | rs187084                                                                                                                                                                             | SEQUENOM   |
| TLR3  | 4      | rs5743305                                                                                                                                   | rs5743305                                                                                                                                                                            | SEQUENOM   |
|       |        | rs11721827                                                                                                                                  | rs11721827, rs11730143, rs11732384                                                                                                                                                   | SEQUENOM   |
|       |        | rs13126816                                                                                                                                  | rs13126816, rs6552950                                                                                                                                                                | SEQUENOM   |
|       |        | rs13108688                                                                                                                                  | rs13108688, rs7657186                                                                                                                                                                | SEQUENOM   |
|       |        | rs5743312                                                                                                                                   | rs3775296, rs5743312, rs5743303                                                                                                                                                      | SEQUENOM   |
|       |        | rs7668666                                                                                                                                   | rs7668666                                                                                                                                                                            | SEQUENOM   |
|       |        | rs3775292                                                                                                                                   | rs3775292                                                                                                                                                                            | SEQUENOM   |
|       |        | rs3775291                                                                                                                                   | rs3775291                                                                                                                                                                            | SEQUENOM   |

**Table S1, part 2.**

|             |                                              |            |                                                                                                                                                                                                                                  |          |
|-------------|----------------------------------------------|------------|----------------------------------------------------------------------------------------------------------------------------------------------------------------------------------------------------------------------------------|----------|
| DDX58       | 9                                            | rs12006123 | rs17289116, rs1133071, rs7045087, rs12555727, rs12006123                                                                                                                                                                         | SEQUENOM |
|             |                                              | rs7865082  | rs7865082, rs3205166                                                                                                                                                                                                             | TaqMan   |
|             |                                              | rs10738890 | rs10738890, rs10738889                                                                                                                                                                                                           | TaqMan   |
|             |                                              | rs9650702  | rs6476362, rs9650702                                                                                                                                                                                                             | SEQUENOM |
|             |                                              | rs9695310  | rs9695310                                                                                                                                                                                                                        | TaqMan   |
|             |                                              | rs944581   | rs944581, rs639949, rs6476363, rs868608                                                                                                                                                                                          | SEQUENOM |
|             |                                              | rs944582   | rs944582                                                                                                                                                                                                                         | SEQUENOM |
|             |                                              | rs17289402 | rs17289402                                                                                                                                                                                                                       | SEQUENOM |
|             |                                              | rs17289627 | rs17289627, rs3824456, rs17290242                                                                                                                                                                                                | SEQUENOM |
|             |                                              | rs944583   | rs7037171, rs944583, rs4384073                                                                                                                                                                                                   | SEQUENOM |
|             |                                              | rs592515   | rs10813821, rs7855688, rs10511907, rs10971001, rs592515, rs10813825, rs7848849                                                                                                                                                   | SEQUENOM |
|             |                                              | rs13286888 | rs13286888, rs13290848, rs13300627, rs13300238, rs11549548, rs7034650, rs17289655, rs12554841, rs13288658, rs17217280, rs17289927, rs669260                                                                                      | SEQUENOM |
|             |                                              | rs10813826 | rs10813826, rs582509, rs10970997                                                                                                                                                                                                 | SEQUENOM |
|             |                                              | rs608227   | rs10738891, rs7026407, rs659527, rs668559, rs4633144, rs621277, rs1622531, rs613645, rs10813829, rs12340133, rs680471, rs3739674, rs10813827, rs608227, rs660819, rs2777729, rs7023269, rs7044989, rs605383, rs658253, rs7022323 | SEQUENOM |
| rs11795343  | rs11795343                                   | SEQUENOM   |                                                                                                                                                                                                                                  |          |
| rs10813831* | rs4013911, rs10970990, rs4013910, rs10813831 | SEQUENOM   |                                                                                                                                                                                                                                  |          |
| ZBP1        | 20                                           | rs4811885* | rs4811885                                                                                                                                                                                                                        | SEQUENOM |
|             |                                              | rs6064572  | rs6064572, rs6123711                                                                                                                                                                                                             | TaqMan   |
|             |                                              | rs8118279  | rs8118279                                                                                                                                                                                                                        | TaqMan   |
|             |                                              | rs4811887  | rs4811887, rs6070180, rs6025653                                                                                                                                                                                                  | SEQUENOM |
|             |                                              | rs4811888* | rs4811888                                                                                                                                                                                                                        | SEQUENOM |
|             |                                              | rs742724   | rs742724                                                                                                                                                                                                                         | SEQUENOM |
|             |                                              | rs2073145  | rs2073145                                                                                                                                                                                                                        | SEQUENOM |
|             |                                              | rs16981188 | rs16981188                                                                                                                                                                                                                       | SEQUENOM |
|             |                                              | rs4811890  | rs2865395, rs4811890                                                                                                                                                                                                             | SEQUENOM |
| TLR7        | X                                            | rs5741880  | rs5743733, rs5741880, rs5935436                                                                                                                                                                                                  | TaqMan   |
|             |                                              | rs179021   | rs179018, rs179021                                                                                                                                                                                                               | SEQUENOM |
|             |                                              | rs179019   | rs179019, rs179014                                                                                                                                                                                                               | SEQUENOM |
|             |                                              | rs1731479  | rs1634322, rs1731479                                                                                                                                                                                                             | SEQUENOM |
|             |                                              | rs179016   | rs179016                                                                                                                                                                                                                         | SEQUENOM |
|             |                                              | rs5743749  | rs5743749                                                                                                                                                                                                                        | SEQUENOM |
|             |                                              | rs1638596  | rs1638596, rs1634321, rs1634320, rs1634323, rs1731478, rs1620233, rs1638597, rs1638595, rs1638594                                                                                                                                | SEQUENOM |
|             |                                              | rs179013   | rs179011, rs179009, rs179013, rs179008                                                                                                                                                                                           | SEQUENOM |

|      |   |            |                                                                             |          |
|------|---|------------|-----------------------------------------------------------------------------|----------|
|      |   | rs179012   | rs179012                                                                    | SEQUENOM |
|      |   | rs179010   | rs179010                                                                    | SEQUENOM |
|      |   | rs1634319  | rs1634319                                                                   | SEQUENOM |
|      |   | rs864058   | rs850633, rs864058                                                          | SEQUENOM |
| TLR8 | X | rs5741883  | rs5741883                                                                   | SEQUENOM |
|      |   | rs3764880  | rs3761624, rs3764879, rs4830805, rs3764880                                  | SEQUENOM |
|      |   | rs17256081 | rs17256081                                                                  | SEQUENOM |
|      |   | rs2109134  | rs2109134                                                                   | SEQUENOM |
|      |   | rs1548731  | rs1548731                                                                   | SEQUENOM |
|      |   | rs5744067  | rs4830808, rs5744067, rs2159377, rs3827469                                  | SEQUENOM |
|      |   | rs2407992  | rs5741886, rs5744069, rs2407992, rs3747414, rs4830807, rs1013151, rs5744080 | SEQUENOM |
|      |   | rs5744088  | rs5744055, rs1013150, rs5744088, rs5744068                                  | SEQUENOM |

\* Genotyping assay failure or not meet the threshold of quality control.

**Table S2.** Genetic models of inheritance of the risk (A) and the protective (B) haplotypes.

**A**

| Model                 | $\beta$        | Wald Test (p)            | AIC            | LR (p)                   |
|-----------------------|----------------|--------------------------|----------------|--------------------------|
| Dominant              | 0.41577        | 2.3766 (0.017472)        | 2349.67        | 5.5011 (0.019004)        |
| Recessive             | 0.48185        | 0.9571 (0.338539)        | 2354.34        | 0.8302 (0.362215)        |
| <b>Multiplicative</b> | <b>0.38289</b> | <b>2.4318 (0.015023)</b> | <b>2349.45</b> | <b>5.7241 (0.016734)</b> |
| General               | 0.40130        | 2.2575 (0.023979)        | 2351.40        | 5.7731 (0.055768)        |

**B**

| Model                 | $\beta$         | Wald Test (p)             | AIC            | LR (p)                   |
|-----------------------|-----------------|---------------------------|----------------|--------------------------|
| Dominant              | -0.67269        | -2.5915 (0.009555)        | 2346.58        | 7.5896 (0.005871)        |
| Recessive             | -15.3711        | -0.0093 (0.992577)        | 2351.92        | 3.2560 (0.071163)        |
| <b>Multiplicative</b> | <b>-0.68408</b> | <b>-2.7237 (0.006455)</b> | <b>2346.57</b> | <b>8.6007 (0.003360)</b> |
| General               | -0.62145        | -2.4028 (0.016270)        | 2347.44        | 9.7301 (0.007712)        |

$\beta$ : Estimated haplotype effect. Wald statistic for testing whether  $\beta = 0$  and the associated p value. Subjects with 1 copy of the risk haplotype have in the recessive model the same risk as those subjects with no copies; in the dominant model, the same risk as those subjects with 2 copies; in the multiplicative model, an intermediate risk on log scale with respect to those subjects with 0 or 2 copies; and in the general model a general change in risk compared to those with 0 or 2 copies. AIC: Akaike information criteria; LR: likelihood-ratio statistic for testing the global null hypothesis.

**Figure S1.** Relative expression levels of the alleles A versus T of the single-nucleotide polymorphism nonsynonymous rs6940.

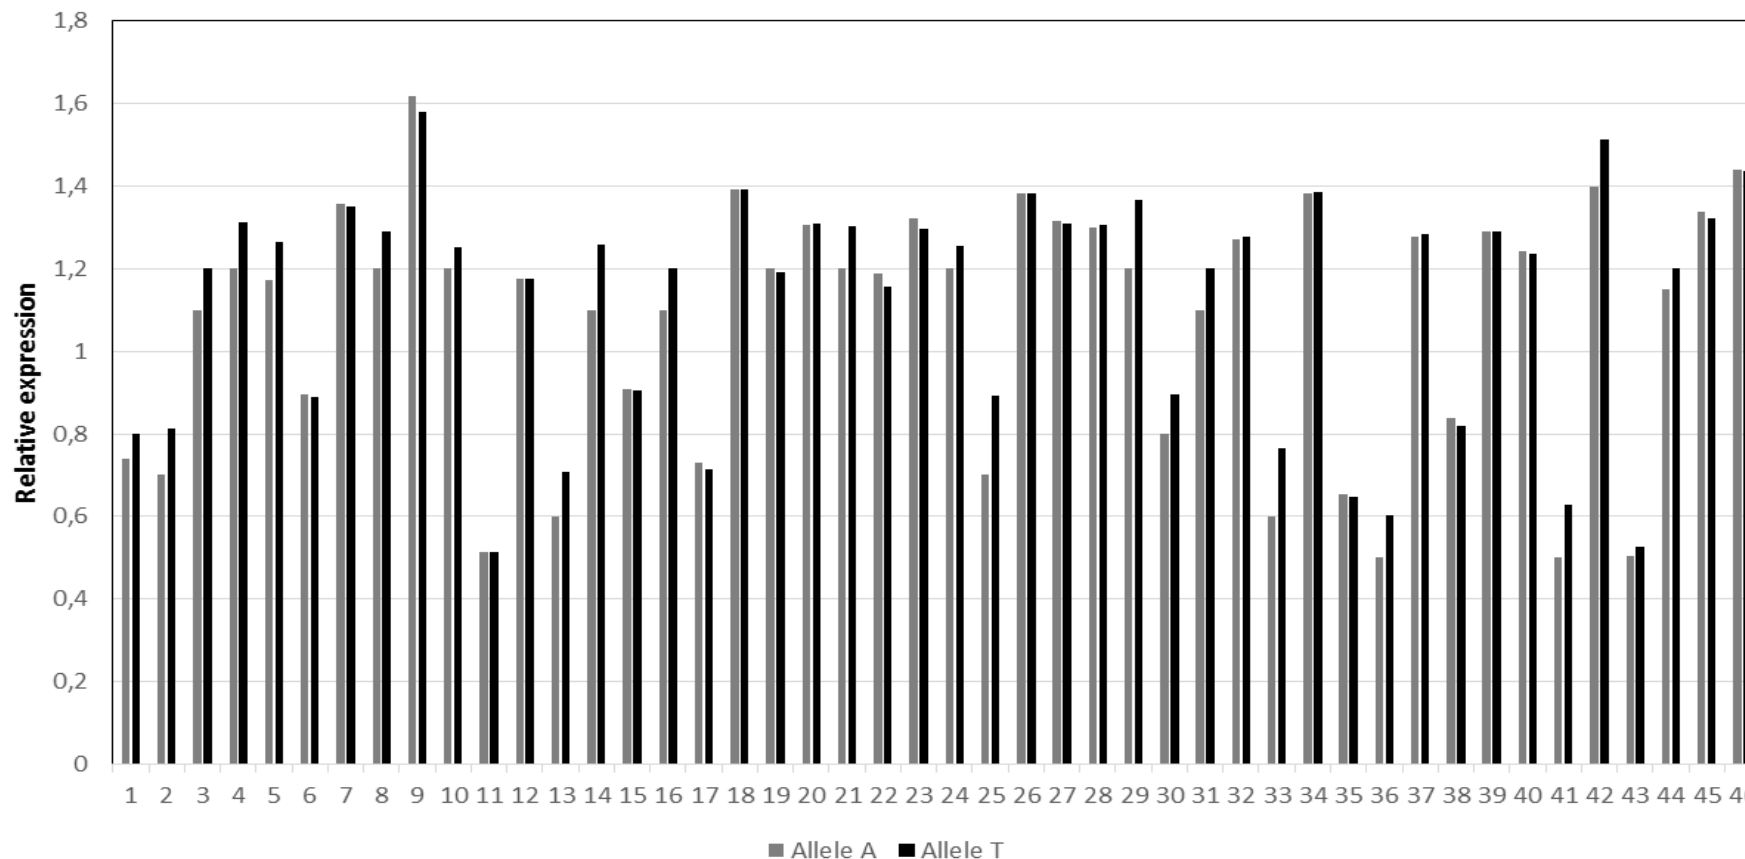

The relative quantification was performed in samples from 46 heterozygous healthy donors. Ratio A/T =  $0.97 \pm 0.08$ ;  $p = 0.027$ .
